# Supplementary material
Source: Research Square preprint supplement (doi:10.21203/rs.3.rs-8957849/v1)
Supplement: Supplementary file 1 [file c2c767dca02a88ad8497afe3.docx]

**Supplementary Information**

**1. Construction of PPIGi-shHIF-1α plasmid**

Table S1 shRNA primer sequences

| **Primers** | **Sequences** |
| --- | --- |
| shHIF-1a-1 oligoT | TGCTGATATGATTGTGTCTCCAGCGGGTTTTGG  CCACTGACTGACCCGCTGGACACAATCATAT |
| shHIF-1a-1 oligoB | CCTGATATGATTGTGTCCAGCGGGTCAGTC  AGTGGCCAAAACCCGCTGGAGACACAATCATATC |
| shHIF-1a-2 oligoT | TGCTGAATATTCATAAATTGAGCGGCGTTTTGGC  CACTGACTGACGCCGCTCATTATGAATATT |
| shHIF-1a-2 oligoB | CCTGAATATTCATAATGAGCGGCGTCAGTCAGTGGC  CAAAACGCCGCTCAATTTATGAATATTC |
| shHIF-1a-3 oligoT | TGCTGTTAATAGCGACAAAGTGCATAGTTTTGGCCACT  GACTGACTATGCACTGTCGCTATTAA |
| shHIF-1a-3 oligoB | CCTGTTAATAGCGACAGTGCATAGTCAGTCAGTGGCCA  AAACTATGCACTTTGTCGCTATTAAC |


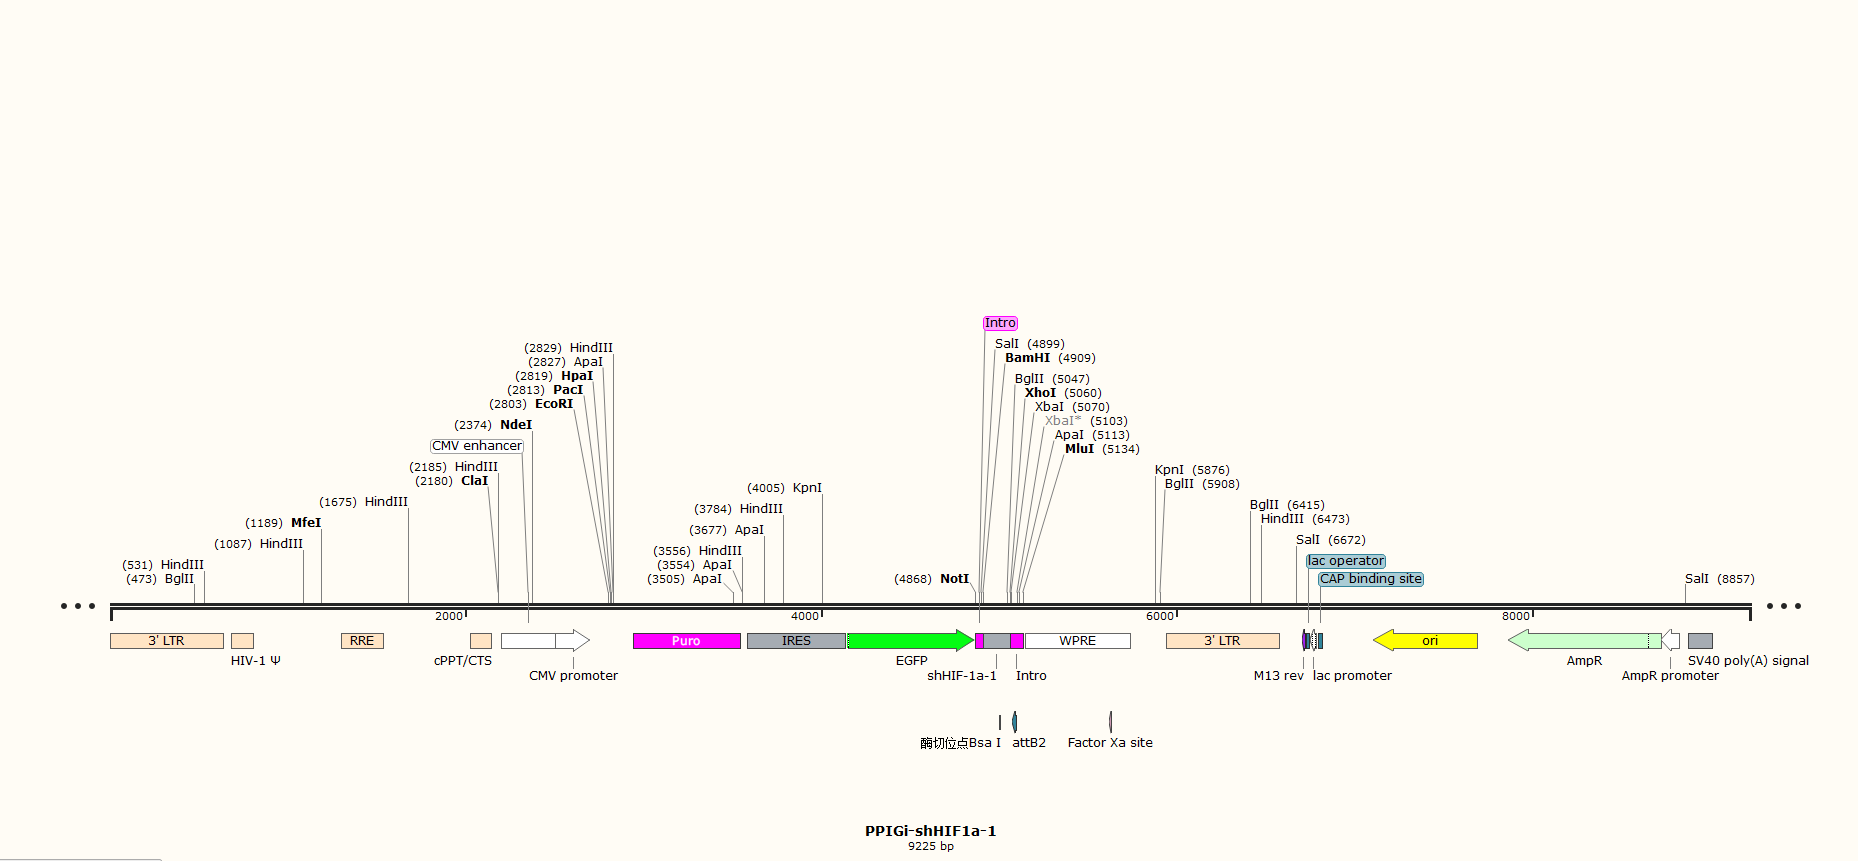


Figure S1-1 Plasmid map of PPIGi-shHIF-1α-1


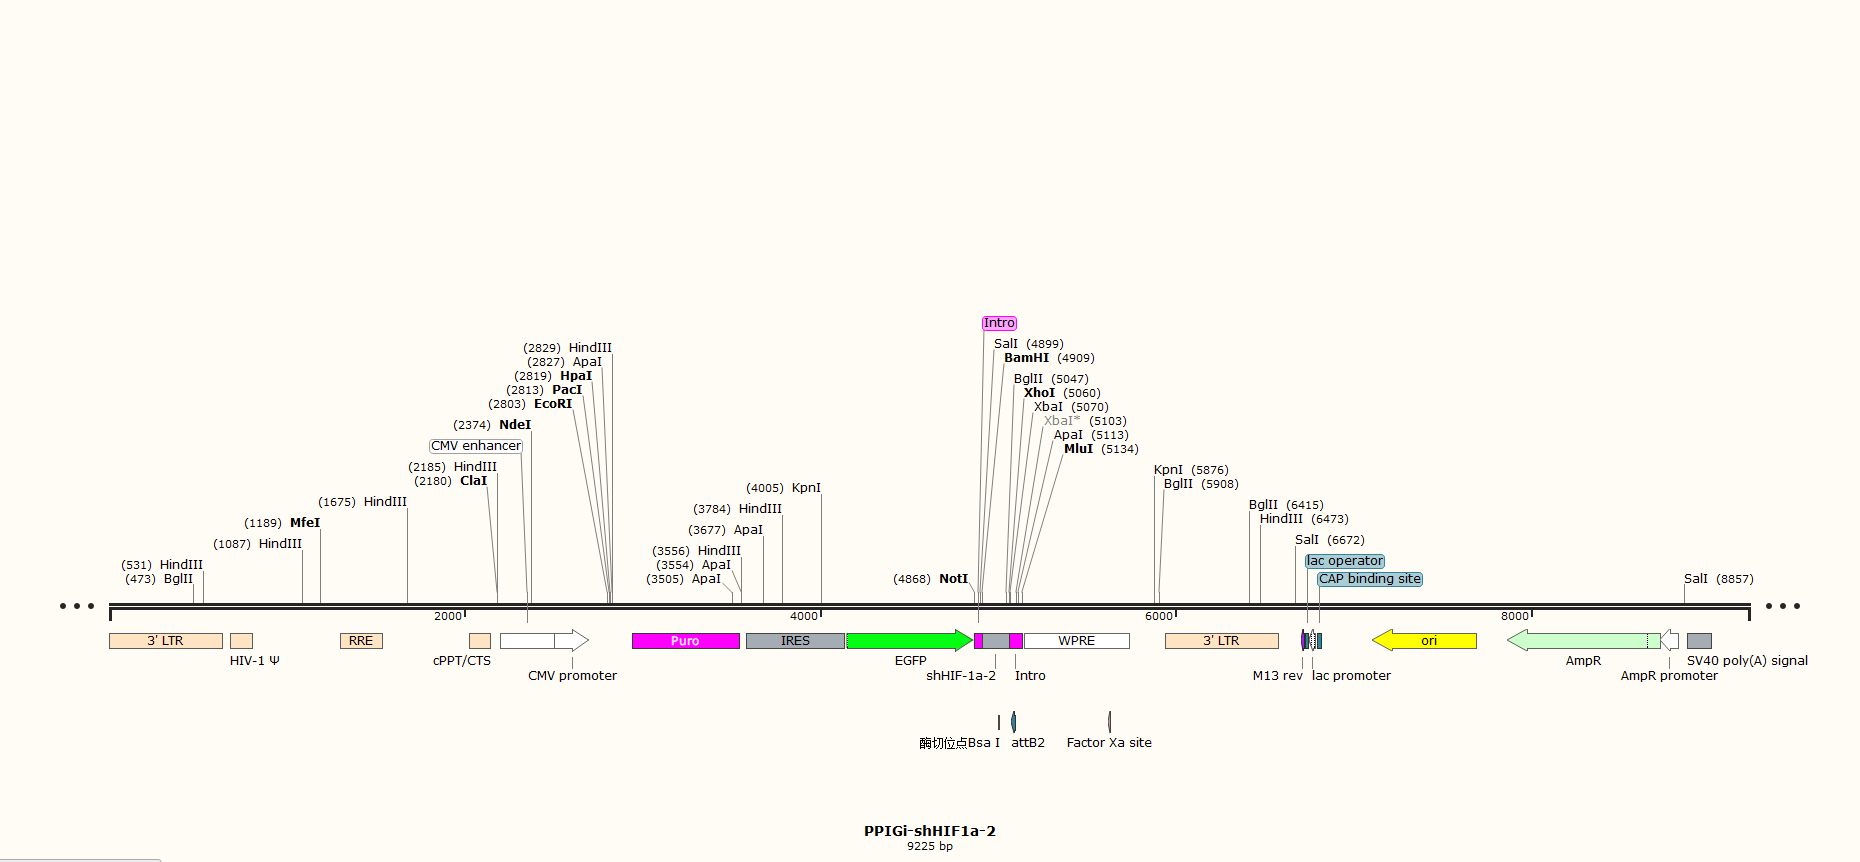


Figure S1-2 Plasmid map of PPIGi-shHIF-1α-2


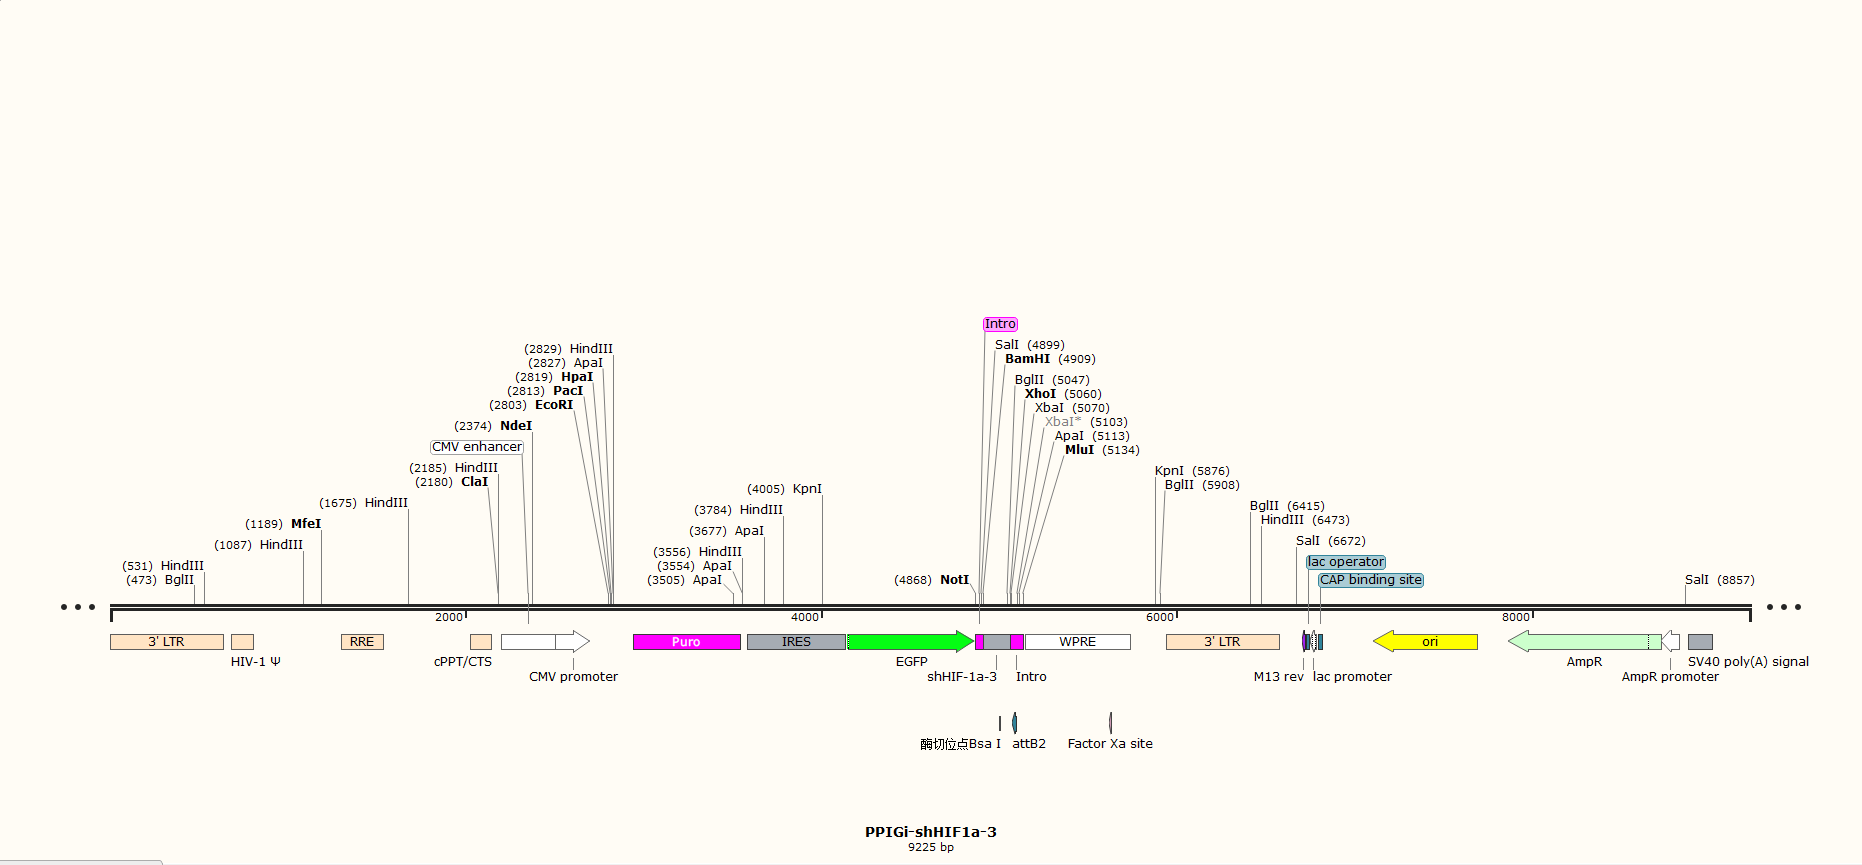


Figure S1-3 Plasmid map of PPIGi-shHIF-1α-3

**2. PCR primer sequences**

Table S2 Primer sequences used in HK-2 cells

| Primer | Sequence (5’ to 3’) | Amplicon length |
| --- | --- | --- |
| Hu-GAPDH-F | GGGGCTCTCCAGAACATC | 123 |
| Hu-GAPDH-R | TGACACGTTGGCAGTGG |  |
| Hu-HIF1α-F | GACAGTACAGGATGCTTGCCA | 100 |
| Hu-HIF1α-R | ACAATGCACTGTGGTTGAGAA |  |
| Hu-PPARγ-F | CCAGAAGCCTGCATTTCTGC | 138 |
| Hu-PPARγ-R | GTGTCAACCATGGTCATTTCGTT |  |

Table S3 Primer sequences used in mouse model

| Primer | Sequence (5’ to 3’) | Amplicon length |
| --- | --- | --- |
| Mu-GAPDH-F | AGGTCGGTGTGAACGGATTTG | 123 |
| Mu-GAPDH-R | TGTAGACCATGTAGTTGAGGTCA |  |
| Mu-HIF1α-F | TCTGCCAGTTTTCTGGGCAA | 154 |
| Mu-HIF1α-R | GGGGAAGTGGCAACTGATGA |  |
| Mu-PPARγ-F | TGTGAGACCAACAGCCTGAC | 111 |
| Mu-PPARγ-R | TCAGTGGTTCACCGCTTCTT |  |

**3. Molecular docking Ligplot 2D schematic diagram**


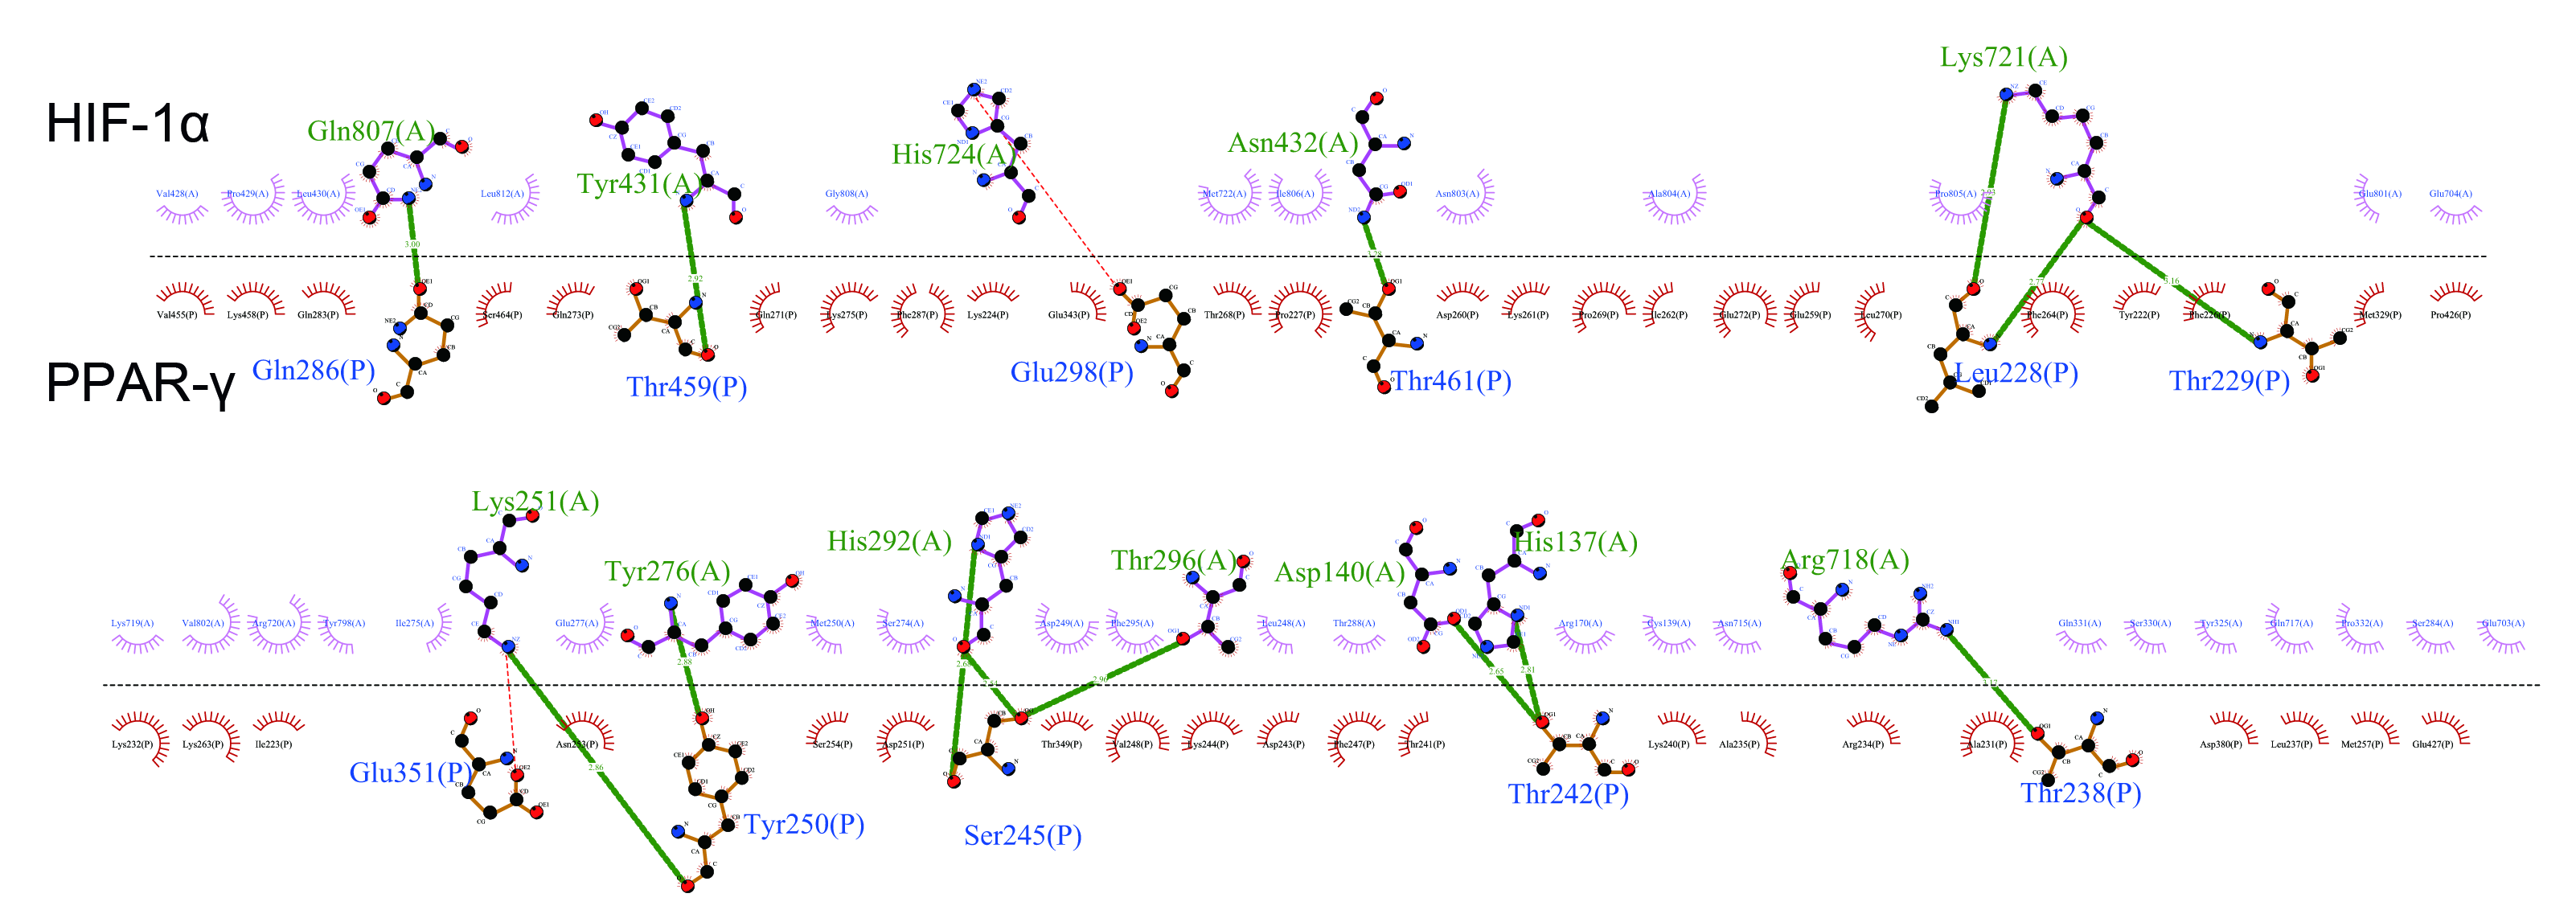


Figure S2 Protein-protein interaction 2D schematic diagram. The green lines in the diagram represent hydrogen bonds, while the red lines represent other interactions.

**4. Photographs of as-prepared CCDs**


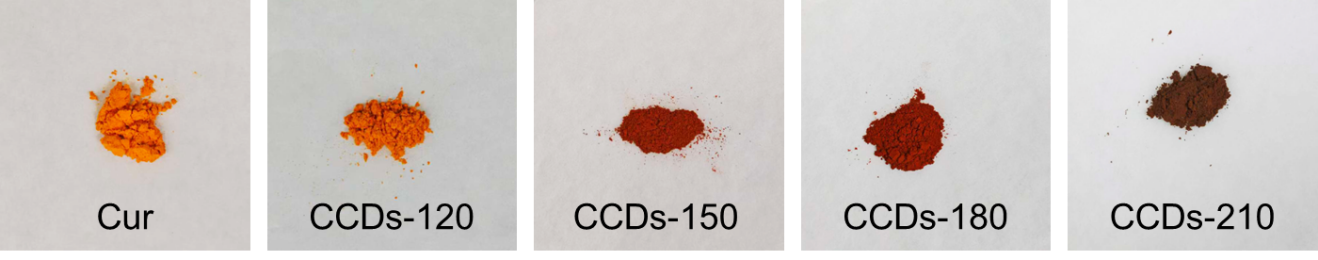


Figure S3 The photographs of CCDs powders.

**5. Transcriptomic analysis heatmap**


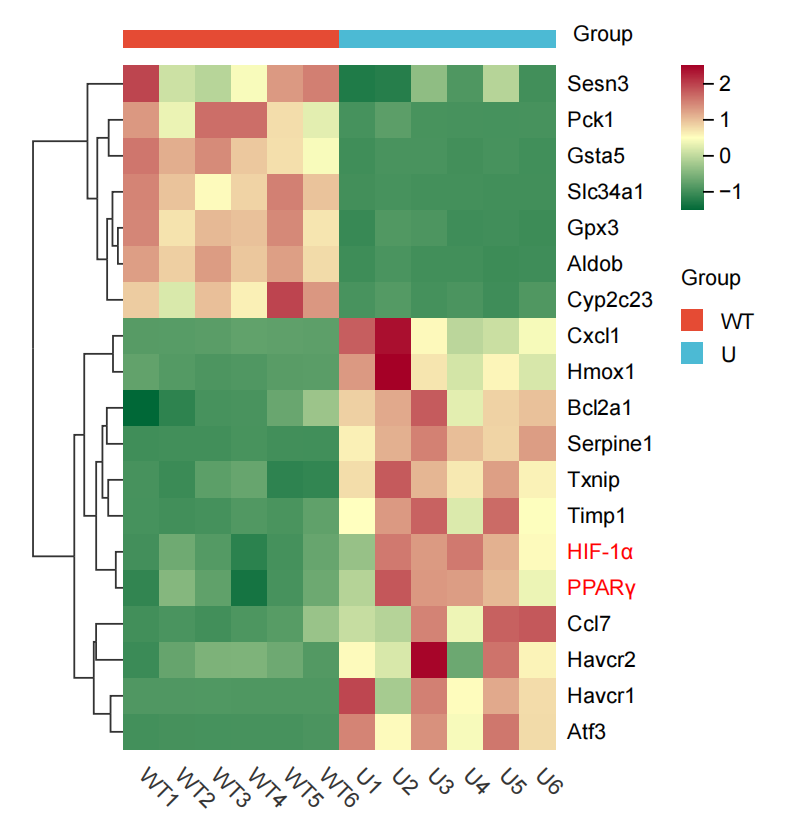


Figure S4 Preliminary transcriptomic heatmap results from the research group revealed that HIF-1α and PPARγ expression was synchronously up-regulated in mouse kidney tissue following uranium exposure.

**6. Carbon dots biocompatibility experimental results**


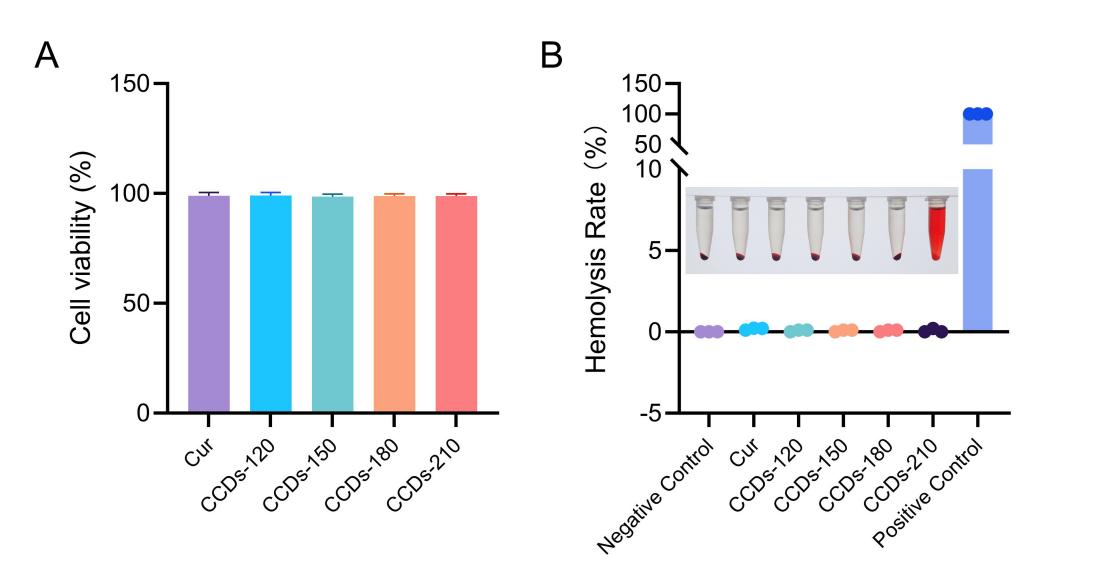


Figure S5 A. Effects of curcumin and curcumin carbon dots (CCDs-120, CCDs-150, CCDs-180, CCDs-210) on the viability of HK-2 cells; B. In vitro hemolysis assay of curcumin and curcumin carbon dots (CCDs-120, CCDs-150, CCDs-180, CCDs-210). The results show that the hemolysis rates in all groups are significantly lower than 5%, indicating excellent biocompatibility.
